# Supplementary material for: Decadal-scale shifts in soil hydraulic properties as induced by altered precipitation
Source: PubMed Central journal article supplement — Sci Adv. 2019 Sep 11;5(9):eaau6635. doi: 10.1126/sciadv.aau6635 (PMC6739112; doi:10.1126/sciadv.aau6635), 2019-09-11
Supplement: aau6635_SM.pdf [file aau6635_SM.pdf]

## Supplementary Materials for

### Decadal-scale shifts in soil hydraulic properties as induced by altered precipitation

Joshua S. Caplan, Daniel Giménez\*, Daniel R. Hirmas, Nathaniel A. Brunsell, John M. Blair, Alan K. Knapp

\*Corresponding author. Email: [gimenez@envsci.rutgers.edu](mailto:gimenez@envsci.rutgers.edu)

Published 11 September 2019, *Sci. Adv.* **5**, eaau6635 (2019)

DOI: 10.1126/sciadv.aau6635

#### This PDF file includes:

- Fig. S1. Aboveground net primary productivity.
- Fig. S2. Metrics of cation dispersive capacity.
- Fig. S3. Relationship between soil crack widths and water content.
- Table S1. Plant community composition.
- Table S2. Statistical modeling summary for infiltration rate.
- Table S3. Statistical modeling summary for various soil properties.
- Table S4. Statistical modeling summary for water retention.
- Table S5. Statistical modeling summary for root diameter.
- Table S6. Statistical modeling summary for soil aggregates and particles.
- Table S7. Statistical modeling summary for aggregate stability.
- Table S8. Aggregate stability.

## Supplementary Figures

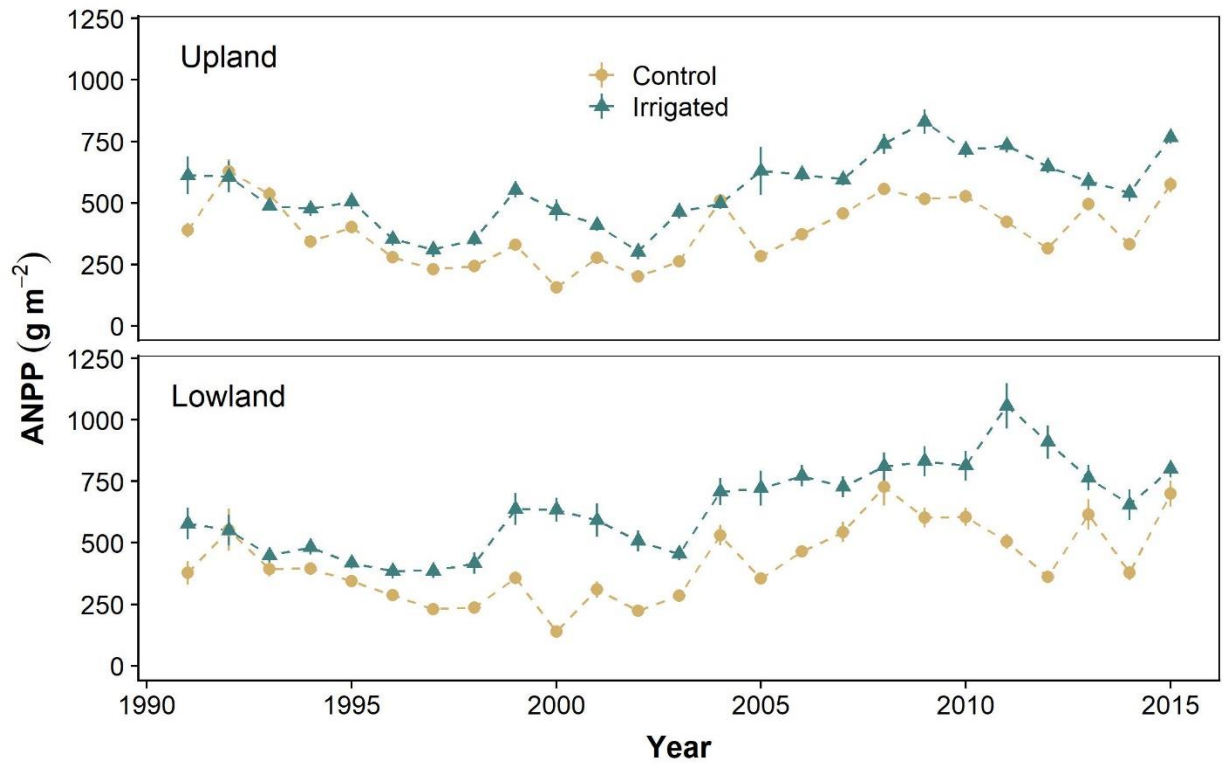

**Fig. S1. Aboveground net primary productivity.** Shown are means and standard errors (SE) across six plots in upland and lowland landscape positions on each transect; each plot contained six replicate subplots that were averaged to derive plot-level values.

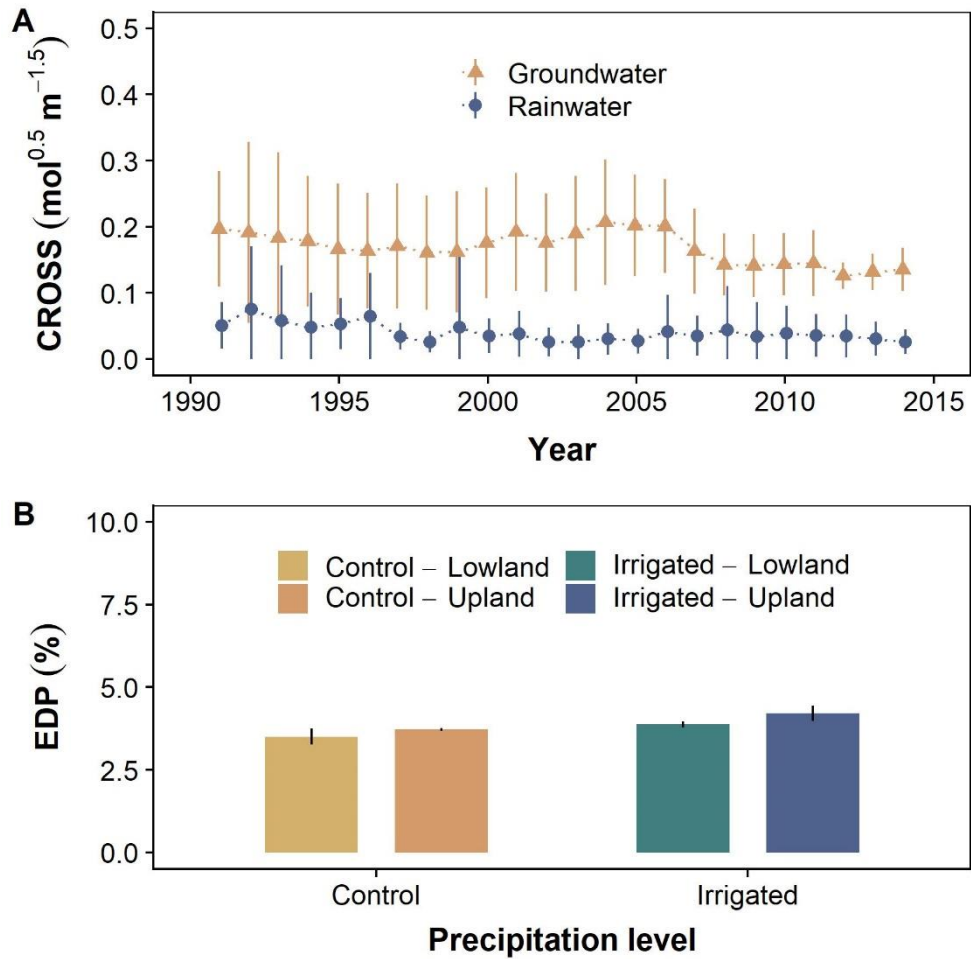

**Fig. S2. Metrics of cation dispersive capacity.** (A) Cation ratio of soil structural stability (CROSS) for groundwater and rainwater at the Konza Prairie Biological Station (mean  $\pm$  standard deviation across all samples collected each year). (B) Exchangeable dispersive percentage (EDP; mean  $\pm$  SE across plot pairs) for soils sampled during this study.

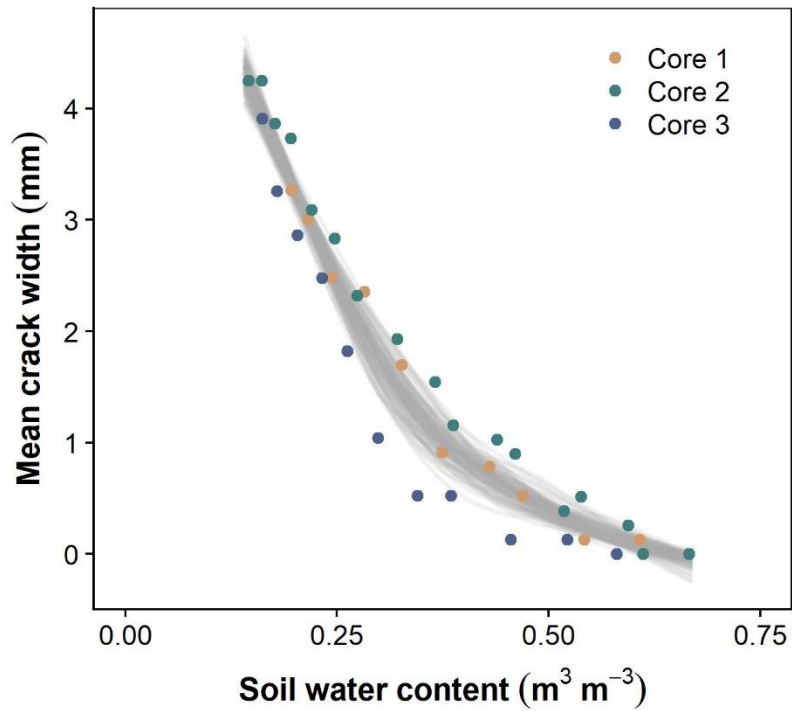

**Fig. S3. Relationship between soil crack widths and water content.** Data come from three cores that were imaged and weighed in the laboratory as they dried. Smoothing splines fit to bootstrapped data (grey lines) were used to translate time series data of volumetric water content (Fig. 1C) into a distribution of crack sizes (Fig. 5C).

## Supplementary Tables

**Table S1. Plant community composition** of Konza Prairie's Irrigation Transect Experiment when the analysis of soil hydraulic properties was conducted. Cover values are relativized to the total cover across all plots in the respective water regime. Fine-root diameters used in computing the community-weighted mean are also shown; values are geometric means of all pertinent root diameter records. Asterisks denote species for which only genus-level data were available.

| Species name                      | Relative cover<br>- Control - | Relative cover<br>- Irrigated - | Root diameter<br>(mm) | Number of<br>records |
|-----------------------------------|-------------------------------|---------------------------------|-----------------------|----------------------|
| <i>Ambrosia psilostachya</i>      | 0.2%                          | 0.2%                            | 0.360                 | 1*                   |
| <i>Amorpha canescens</i>          | 4.2%                          | 6.8%                            | 0.194                 | 1                    |
| <i>Andropogon gerardii</i>        | 56.8%                         | 29.0%                           | 0.212                 | 4                    |
| <i>Asclepias verticillata</i>     | 0.5%                          | 0.2%                            | 0.422                 | 5                    |
| <i>Bouteloua curtipendula</i>     | 1.4%                          | 1.4%                            | 0.175                 | 16                   |
| <i>Brickellia eupatorioides</i>   | 0.3%                          | 1.0%                            |                       |                      |
| <i>Carex inops</i>                | 1.5%                          | 0.1%                            | 0.418                 | 55*                  |
| <i>Carex meadii</i>               | 1.8%                          | 0.6%                            | 0.418                 | 55*                  |
| <i>Chamaecrista fasciculata</i>   | 0.5%                          | 0.2%                            | 0.253                 | 9                    |
| <i>Cornus drummondii</i>          | 2.1%                          | 0.0%                            | 0.748                 | 1*                   |
| <i>Croton monanthogynus</i>       | 0.0%                          | 0.1%                            |                       |                      |
| <i>Dalea candida</i>              | 0.8%                          | 0.2%                            | 0.306                 | 7                    |
| <i>Desmanthus illinoensis</i>     | 0.0%                          | 9.7%                            | 0.270                 | 9                    |
| <i>Dichanthelium oligosanthes</i> | 0.5%                          | 0.3%                            |                       |                      |
| <i>Eragrostis spectabilis</i>     | 0.3%                          | 0.1%                            | 0.210                 | 1*                   |
| <i>Eupatorium altissimum</i>      | 0.0%                          | 0.1%                            | 0.346                 | 9                    |
| <i>Euphorbia nutans</i>           | 0.2%                          | 0.0%                            | 0.195                 | 2                    |
| <i>Helianthus pauciflorus</i>     | 0.0%                          | 0.7%                            | 0.360                 | 1                    |
| <i>Lespedeza capitata</i>         | 0.0%                          | 0.3%                            | 0.306                 | 6                    |
| <i>Linum sulcatum</i>             | 1.3%                          | 0.0%                            |                       |                      |
| <i>Mimosa nuttallii</i>           | 0.0%                          | 1.8%                            |                       |                      |
| <i>Panicum virgatum</i>           | 10.5%                         | 32.4%                           | 0.229                 | 10                   |
| <i>Physalis pumila</i>            | 0.3%                          | 0.1%                            | 0.300                 | 1*                   |
| <i>Rosa arkansana</i>             | 1.1%                          | 0.1%                            | 0.306                 | 1                    |
| <i>Ruellia humilis</i>            | 1.0%                          | 0.6%                            | 0.428                 | 14                   |
| <i>Salvia azurea</i>              | 1.7%                          | 0.8%                            | 0.335                 | 12                   |
| <i>Schizachyrium scoparium</i>    | 4.2%                          | 1.8%                            | 0.216                 | 17                   |
| <i>Solidago canadensis</i>        | 1.3%                          | 2.4%                            | 0.205                 | 5                    |
| <i>Solidago missouriensis</i>     | 0.5%                          | 2.4%                            | 0.291                 | 2                    |
| <i>Sorghastrum nutans</i>         | 4.8%                          | 3.7%                            | 0.237                 | 20                   |
| <i>Sporobolus asper</i>           | 1.1%                          | 1.8%                            | 0.332                 | 3*                   |
| <i>Symphyotrichum ericoides</i>   | 0.8%                          | 0.3%                            | 0.318                 | 2                    |
| <i>Teucrium canadense</i>         | 0.2%                          | 0.3%                            | 0.313                 | 2*                   |
| <i>Vernonia baldwinii</i>         | 0.3%                          | 0.2%                            | 0.325                 | 9                    |

**Table S2. Statistical modeling summary for infiltration rate.** Model-level descriptors are shown at left, including the attribute defining the data used as the response variable ( $Data_{res}$ ), the mean  $R^2$  of model variants with  $\Delta AIC_c < 2$ , the number of observations in the dataset ( $N_{obs}$ ), and the number of model variants used for model averaging (those with  $\Delta AIC_c < 6$ ). Term-level descriptors are shown at right, including the name of the term (Term), the standardized coefficient determined by model averaging, the standard error of the coefficient (SE), and the 95% confidence interval of the coefficient (95% CI).  $h$ , pressure potential,  $Posn$ , landscape position;  $Regm$ , precipitation regime.

| Model          |       |           |           | Terms              |        |       |                  |
|----------------|-------|-----------|-----------|--------------------|--------|-------|------------------|
| $Data_{res}$   | $R^2$ | $N_{obs}$ | $N_{mod}$ | Term               | Coef   | SE    | 95% CI           |
| $h = -0.5$ hPa | 0.42  | 91        | 4         | Posn               | -0.012 | 0.042 | (-0.094, 0.069)  |
|                |       |           |           | Regm               | 0.001  | 0.041 | (-0.081, 0.082)  |
| $h = -1.5$ hPa | 0.38  | 94        | 5         | Posn               | -0.003 | 0.038 | (-0.077, 0.070)  |
|                |       |           |           | Regm               | -0.086 | 0.091 | (-0.265, 0.094)  |
|                |       |           |           | Posn $\times$ Regm | 0.000  | 0.028 | (-0.054, 0.054)  |
| $h = -2.5$ hPa | 0.38  | 94        | 5         | Posn               | 0.019  | 0.050 | (-0.079, 0.116)  |
|                |       |           |           | Regm               | -0.150 | 0.100 | (-0.347, 0.046)  |
|                |       |           |           | Posn $\times$ Regm | 0.002  | 0.038 | (-0.072, 0.076)  |
| $h = -3.5$ hPa | 0.36  | 91        | 5         | Posn               | 0.107  | 0.092 | (-0.073, 0.286)  |
|                |       |           |           | Regm               | -0.219 | 0.106 | (-0.428, -0.010) |
|                |       |           |           | Posn $\times$ Regm | 0.027  | 0.085 | (-0.140, 0.193)  |
| $h = -5.5$ hPa | 0.29  | 92        | 5         | Posn               | 0.026  | 0.059 | (-0.091, 0.143)  |
|                |       |           |           | Regm               | -0.184 | 0.106 | (-0.391, 0.023)  |
|                |       |           |           | Posn $\times$ Regm | 0.002  | 0.044 | (-0.083, 0.088)  |

**Table S3. Statistical modeling summary for various soil properties.** Model-level descriptors are shown at left, including the data used as the response variable ( $\text{Data}_{\text{res}}$ ), the mean  $R^2$  of model variants with  $\Delta\text{AIC}_c < 2$ , the number of observations in the dataset ( $N_{\text{obs}}$ ), and the number of model variants used for model averaging (those with  $\Delta\text{AIC}_c < 6$ ). Term-level descriptors are shown at right, including the name of the term (Term), the standardized coefficient determined by model averaging (Coef), the standard error of the coefficient (SE), and the 95% confidence interval of the coefficient (95% CI). Abbreviations are defined in table S2; additionally *EDP*, exchangeable dispersive percentage.

| Model                      |       |                  |                  | Terms              |       |      |                  |
|----------------------------|-------|------------------|------------------|--------------------|-------|------|------------------|
| $\text{Data}_{\text{res}}$ | $R^2$ | $N_{\text{obs}}$ | $N_{\text{mod}}$ | Term               | Coef  | SE   | 95% CI           |
| Porosity                   | 0.74  | 8                | 1                | Posn               | 0.08  | 0.17 | (-0.248, 0.410)  |
|                            |       |                  |                  | Regm               | 0.52  | 0.17 | (0.195, 0.852)   |
|                            |       |                  |                  | Posn $\times$ Regm | -1.22 | 0.34 | (-1.873, -0.557) |
| Carbon                     | 0.26  | 72               | 4                | Posn               | 0.90  | 0.28 | (0.363, 1.444)   |
|                            |       |                  |                  | Regm               | 0.07  | 0.19 | (-0.299, 0.435)  |
|                            |       |                  |                  | Posn $\times$ Regm | -0.01 | 0.12 | (-0.240, 0.213)  |
| Nitrogen                   | 0.37  | 72               | 3                | Posn               | 1.16  | 0.18 | (0.798, 1.518)   |
|                            |       |                  |                  | Regm               | 0.06  | 0.17 | (-0.276, 0.386)  |
|                            |       |                  |                  | Posn $\times$ Regm | -0.01 | 0.10 | (-0.217, 0.194)  |
| EDP                        | 0.12  | 24               | 4                | Posn               | -0.15 | 0.31 | (-0.458, 0.750)  |
|                            |       |                  |                  | Regm               | 0.43  | 0.50 | (-0.548, 1.409)  |

**Table S4. Statistical modeling summary for water retention.** Model-level descriptors are shown at left, including the attribute defining the data used as the response variable ( $\text{Data}_{\text{res}}$ ), the mean  $R^2$  of model variants with  $\Delta\text{AIC}_c < 2$ , the number of observations in the dataset ( $N_{\text{obs}}$ ), and the number of model variants used for model averaging (those with  $\Delta\text{AIC}_c < 6$ ). Term-level descriptors are shown at right, including the name of the term (Term), the standardized coefficient determined by model averaging (Coef), the standard error of the coefficient (SE), and the 95% confidence interval of the coefficient (95% CI). Abbreviations are defined in table S2.

| Model                      |       |                  |                  | Terms                          |        |       |                  |
|----------------------------|-------|------------------|------------------|--------------------------------|--------|-------|------------------|
| $\text{Data}_{\text{res}}$ | $R^2$ | $N_{\text{obs}}$ | $N_{\text{mod}}$ | Term                           | Coef   | SE    | 95% CI           |
| pF = 0.5 - 1               | 0.94  | 176              | 5                | pF                             | -0.630 | 0.015 | (-0.659, -0.601) |
|                            |       |                  |                  | Posn                           | -0.037 | 0.177 | (-0.384, 0.311)  |
|                            |       |                  |                  | Regm                           | 0.131  | 0.172 | (-0.206, 0.469)  |
|                            |       |                  |                  | pF $\times$ Posn               | 0.199  | 0.029 | (0.141, 0.257)   |
|                            |       |                  |                  | pF $\times$ Regm               | 0.040  | 0.032 | (-0.023, 0.103)  |
|                            |       |                  |                  | Posn $\times$ Regm             | 0.348  | 0.360 | (-0.357, 1.053)  |
|                            |       |                  |                  | pF $\times$ Posn $\times$ Regm | 0.123  | 0.089 | (-0.050, 0.297)  |
| pF = 1 - 1.5               | 0.98  | 176              | 1                | pF                             | -0.816 | 0.009 | (-0.832, -0.799) |
|                            |       |                  |                  | Posn                           | 0.224  | 0.116 | (-0.003, 0.451)  |
|                            |       |                  |                  | Regm                           | 0.208  | 0.116 | (-0.019, 0.434)  |
|                            |       |                  |                  | pF $\times$ Posn               | 0.132  | 0.017 | (0.099, 0.165)   |
|                            |       |                  |                  | pF $\times$ Regm               | 0.058  | 0.017 | (0.024, 0.091)   |
|                            |       |                  |                  | Posn $\times$ Regm             | 0.144  | 0.231 | (-0.309, 0.598)  |
|                            |       |                  |                  | pF $\times$ Posn $\times$ Regm | -0.239 | 0.034 | (-0.306, -0.172) |
| pF = 1.5 - 2               | 0.99  | 176              | 5                | pF                             | -0.695 | 0.006 | (-0.706, -0.683) |
|                            |       |                  |                  | Posn                           | 0.412  | 0.133 | (0.152, 0.672)   |
|                            |       |                  |                  | Regm                           | 0.244  | 0.137 | (-0.025, 0.513)  |
|                            |       |                  |                  | pF $\times$ Posn               | 0.051  | 0.011 | (0.029, 0.074)   |
|                            |       |                  |                  | pF $\times$ Regm               | -0.027 | 0.014 | (-0.054, 0.000)  |
|                            |       |                  |                  | Posn $\times$ Regm             | 0.006  | 0.161 | (-0.309, 0.321)  |
|                            |       |                  |                  | pF $\times$ Posn $\times$ Regm | 0.007  | 0.017 | (-0.027, 0.041)  |



|              |      |     |   |                  |        |       |                  |
|--------------|------|-----|---|------------------|--------|-------|------------------|
| pF = 2 - 2.5 | 0.98 | 176 | 4 | pF               | -0.703 | 0.009 | (-0.721, -0.685) |
|              |      |     |   | Posn             | 0.467  | 0.122 | (0.228, 0.706)   |
|              |      |     |   | Regm             | 0.180  | 0.122 | (-0.059, 0.419)  |
|              |      |     |   | pF × Posn        | 0.019  | 0.019 | (-0.018, 0.055)  |
|              |      |     |   | pF × Regm        | -0.072 | 0.018 | (-0.108, -0.036) |
|              |      |     |   | Posn × Regm      | 0.088  | 0.220 | (-0.344, 0.519)  |
|              |      |     |   | pF × Posn × Regm | 0.079  | 0.057 | (-0.033, 0.191)  |
| pF = 2.5 - 3 | 0.98 | 176 | 1 | pF               | -0.801 | 0.008 | (-0.817, -0.785) |
|              |      |     |   | Posn             | 0.344  | 0.102 | (0.144, 0.545)   |
|              |      |     |   | Regm             | 0.121  | 0.102 | (-0.080, 0.322)  |
|              |      |     |   | pF × Posn        | -0.158 | 0.016 | (-0.190, -0.126) |
|              |      |     |   | pF × Regm        | -0.005 | 0.016 | (-0.037, 0.027)  |
|              |      |     |   | Posn × Regm      | 0.328  | 0.205 | (-0.074, 0.729)  |
|              |      |     |   | pF × Posn × Regm | 0.203  | 0.033 | (0.140, 0.267)   |
| pF = 3 - 3.5 | 0.98 | 176 | 6 | pF               | -0.672 | 0.009 | (-0.689, -0.655) |
|              |      |     |   | Posn             | 0.306  | 0.158 | (-0.003, 0.616)  |
|              |      |     |   | Regm             | 0.089  | 0.143 | (-0.191, 0.37)   |
|              |      |     |   | pF × Posn        | 0.001  | 0.009 | (-0.018, 0.019)  |
|              |      |     |   | pF × Regm        | -0.075 | 0.018 | (-0.110, -0.041) |
|              |      |     |   | Posn × Regm      | 0.478  | 0.363 | (-0.233, 1.189)  |
|              |      |     |   | pF × Posn × Regm | -0.002 | 0.011 | (-0.024, 0.021)  |
| pF = 3.5 - 4 | 0.96 | 176 | 1 | pF               | -0.725 | 0.013 | (-0.749, -0.700) |
|              |      |     |   | Posn             | 0.255  | 0.129 | (0.002, 0.508)   |
|              |      |     |   | Regm             | -0.125 | 0.129 | (-0.377, 0.128)  |
|              |      |     |   | pF × Posn        | -0.161 | 0.025 | (-0.211, -0.111) |
|              |      |     |   | pF × Regm        | -0.171 | 0.025 | (-0.221, -0.121) |
|              |      |     |   | Posn × Regm      | 0.230  | 0.258 | (-0.275, 0.735)  |
|              |      |     |   | pF × Posn × Regm | -0.540 | 0.051 | (-0.639, -0.440) |

**Table S5. Statistical modeling summary for root diameter**, computed as the community-weighted mean during each year of the experiment (Fig. 4) and analyzed in 5 yr increments. Model-level descriptors are shown at left, including the data used as the response variable ( $\text{Data}_{\text{res}}$ ), the mean  $R^2$  of model variants with  $\Delta\text{AIC}_c < 2$ , the number of observations in the dataset ( $N_{\text{obs}}$ ), and the number of model variants used for model averaging (those with  $\Delta\text{AIC}_c < 6$ ). Term-level descriptors are shown at right, including the name of the term (Term), the standardized coefficient determined by model averaging (Coef), the standard error of the coefficient (SE), and the 95% confidence interval of the coefficient (95% CI). Abbreviations are defined in table S2.

| Model                      |       |                  |                  | Terms              |        |       |                 |
|----------------------------|-------|------------------|------------------|--------------------|--------|-------|-----------------|
| $\text{Data}_{\text{res}}$ | $R^2$ | $N_{\text{obs}}$ | $N_{\text{mod}}$ | Term               | Coef   | SE    | 95% CI          |
| Years<br>1991-1995         | 0.53  | 180              | 5                | Posn               | -0.069 | 0.122 | (-0.309, 0.170) |
|                            |       |                  |                  | Regm               | 0.007  | 0.075 | (-0.141, 0.155) |
|                            |       |                  |                  | Posn $\times$ Regm | -0.005 | 0.058 | (-0.119, 0.109) |
| Years<br>1996-2000         | 0.75  | 240              | 5                | Posn               | -0.101 | 0.139 | (-0.373, 0.171) |
|                            |       |                  |                  | Regm               | 0.030  | 0.089 | (-0.143, 0.204) |
|                            |       |                  |                  | Posn $\times$ Regm | -0.004 | 0.062 | (-0.125, 0.117) |
| Years<br>2001-2005         | 0.72  | 240              | 5                | Posn               | 0.286  | 0.168 | (-0.043, 0.616) |
|                            |       |                  |                  | Regm               | 0.186  | 0.150 | (-0.107, 0.480) |
|                            |       |                  |                  | Posn $\times$ Regm | 0.002  | 0.099 | (-0.191, 0.196) |
| Years<br>2006-2010         | 0.68  | 240              | 5                | Posn               | 0.078  | 0.123 | (-0.163, 0.320) |
|                            |       |                  |                  | Regm               | -0.005 | 0.073 | (-0.148, 0.138) |
|                            |       |                  |                  | Posn $\times$ Regm | 0.005  | 0.057 | (-0.108, 0.117) |
| Years<br>2011-2015         | 0.59  | 240              | 4                | Posn               | 0.325  | 0.145 | (0.042, 0.609)  |
|                            |       |                  |                  | Regm               | 0.029  | 0.081 | (-0.130, 0.188) |
|                            |       |                  |                  | Posn $\times$ Regm | 0.012  | 0.083 | (-0.151, 0.174) |

**Table S6. Statistical modeling summary for soil aggregates and particles.** Model-level descriptors are shown at left, including the attribute defining the data used as the response variable ( $Data_{res}$ ), the mean  $R^2$  of model variants with  $\Delta AIC_c < 2$ , the number of observations in the dataset ( $N_{obs}$ ), and the number of model variants used for model averaging (those with  $\Delta AIC_c < 6$ ). Term-level descriptors are shown at right, including the name and transformation of the term (Term), the standardized coefficient determined by model averaging (Coef), the standard error of the coefficient (SE), and the 95% confidence interval of the coefficient (95% CI). Abbreviations are defined in table S2; additionally *Diam*, particle diameter.

| Model                        |       |           |           | Terms                                 |        |       |                  |
|------------------------------|-------|-----------|-----------|---------------------------------------|--------|-------|------------------|
| $Data_{res}$                 | $R^2$ | $N_{obs}$ | $N_{mod}$ | Term                                  | Coef   | SE    | 95% CI           |
| $\varnothing = 0.1-1 \mu m$  | 0.87  | 1464      | 5         | log(Diam)                             | 0.937  | 0.010 | (0.917, 0.957)   |
|                              |       |           |           | Posn                                  | -0.060 | 0.015 | (-0.089, -0.032) |
|                              |       |           |           | Regm                                  | -0.046 | 0.015 | (-0.075, -0.018) |
|                              |       |           |           | log(Diam) $\times$ Posn               | -0.131 | 0.019 | (-0.168, -0.094) |
|                              |       |           |           | log(Diam) $\times$ Regm               | -0.041 | 0.023 | (-0.086, 0.004)  |
|                              |       |           |           | Posn $\times$ Regm                    | 0.000  | 0.017 | (-0.033, 0.033)  |
|                              |       |           |           | log(Diam) $\times$ Posn $\times$ Regm | 0.002  | 0.013 | (-0.023, 0.027)  |
| $\varnothing = 1-10 \mu m$   | 0.95  | 1800      | 3         | log(Diam)                             | 0.894  | 0.005 | (0.884, 0.904)   |
|                              |       |           |           | Posn                                  | -0.238 | 0.054 | (-0.343, -0.132) |
|                              |       |           |           | Regm                                  | -0.107 | 0.054 | (-0.212, -0.001) |
|                              |       |           |           | log(Diam) $\times$ Posn               | -0.106 | 0.010 | (-0.126, -0.086) |
|                              |       |           |           | log(Diam) $\times$ Regm               | -0.073 | 0.010 | (-0.093, -0.053) |
|                              |       |           |           | Posn $\times$ Regm                    | 0.009  | 0.064 | (-0.117, 0.134)  |
|                              |       |           |           | log(Diam) $\times$ Posn $\times$ Regm | -0.001 | 0.007 | (-0.014, 0.013)  |
| $\varnothing = 10-100 \mu m$ | 0.72  | 1728      | 3         | log(Diam)                             | 0.835  | 0.013 | (0.811, 0.86)    |
|                              |       |           |           | Posn                                  | 0.096  | 0.013 | (0.070, 0.121)   |
|                              |       |           |           | Regm                                  | 0.040  | 0.013 | (0.015, 0.065)   |
|                              |       |           |           | log(Diam) $\times$ Posn               | 0.142  | 0.025 | (0.092, 0.191)   |
|                              |       |           |           | log(Diam) $\times$ Regm               | 0.110  | 0.025 | (0.061, 0.160)   |
|                              |       |           |           | Posn $\times$ Regm                    | -0.028 | 0.028 | (-0.084, 0.028)  |
|                              |       |           |           | log(Diam) $\times$ Posn $\times$ Regm | -0.008 | 0.028 | (-0.063, 0.047)  |

**Table S6 (continued).**

| Model               |                |                  |                  | Terms            |        |       |                  |
|---------------------|----------------|------------------|------------------|------------------|--------|-------|------------------|
| Data <sub>res</sub> | R <sup>2</sup> | N <sub>obs</sub> | N <sub>mod</sub> | Term             | Coef   | SE    | 95% CI           |
| ∅ = 100-<br>1000 μm | 0.65           | 1800             | 13               | log(Diam)        | -0.802 | 0.014 | (-0.829, -0.774) |
|                     |                |                  |                  | Posn             | -0.026 | 0.024 | (-0.074, 0.021)  |
|                     |                |                  |                  | Regm             | -0.005 | 0.015 | (-0.034, 0.024)  |
|                     |                |                  |                  | log(Diam) × Posn | 0.008  | 0.020 | (-0.030, 0.047)  |
|                     |                |                  |                  | log(Diam) × Regm | -0.001 | 0.010 | (-0.021, 0.019)  |
|                     |                |                  |                  | Posn × Regm      | 0.005  | 0.020 | (-0.034, 0.044)  |

**Table S7. Statistical modeling summary for aggregate stability.** Model-level descriptors are shown at left, including the attribute defining the data used as the response variable (Data<sub>res</sub>), the mean R<sup>2</sup> of model variants with  $\Delta AIC_c < 2$ , the number of observations in the dataset (N<sub>obs</sub>), and the number of model variants used for model averaging (those with  $\Delta AIC_c < 6$ ). Term-level descriptors are shown at right, including the name of the term (Term), the standardized coefficient determined by model averaging (Coef), the standard error of the coefficient (SE), and the 95% confidence interval of the coefficient (95% CI). Abbreviations are defined in table S2. Empty cells indicate that no model variant had an AIC<sub>c</sub> within 6 points of the intercept-only model.

| Model               |                |                  |                  | Terms |       |      |                 |
|---------------------|----------------|------------------|------------------|-------|-------|------|-----------------|
| Data <sub>res</sub> | R <sup>2</sup> | N <sub>obs</sub> | N <sub>mod</sub> | Term  | Coef  | SE   | 95% CI          |
| 2 mm mesh           | 0.00           | 15               | 1                | -     | -     | -    | -               |
| 1 mm mesh           | 0.03           | 16               | 2                | Regm  | -0.02 | 0.15 | (-0.311, 0.269) |
| 0.25 mm mesh        | 0.02           | 16               | 2                | Posn  | -0.05 | 0.22 | (-0.474, 0.384) |
| 0.053 mm mesh       | 0.00           | 16               | 1                | -     | -     | -    | -               |

**Table S8. Aggregate stability**, measured as the percentage of aggregate mass retained by a sieve before vs. after agitation in water.

| <b>Sieve size</b> | <b>Water regime</b> | <b>Landscape position</b> | <b>Percent retained</b> |
|-------------------|---------------------|---------------------------|-------------------------|
| <b>2 mm</b>       | Control             | Lowland                   | 92.5 ± 0.3              |
|                   |                     | Upland                    | 91.2 ± 0.3              |
|                   | Irrigated           | Lowland                   | 90.6 ± 0.7              |
|                   |                     | Upland                    | 92.0 ± 1.6              |
| <b>1 mm</b>       | Control             | Lowland                   | 94.8 ± 0.4              |
|                   |                     | Upland                    | 93.9 ± 0.9              |
|                   | Irrigated           | Lowland                   | 93.4 ± 0.7              |
|                   |                     | Upland                    | 93.4 ± 2.2              |
| <b>0.25 mm</b>    | Control             | Lowland                   | 97.4 ± 0.5              |
|                   |                     | Upland                    | 95.9 ± 0.8              |
|                   | Irrigated           | Lowland                   | 96.2 ± 0.4              |
|                   |                     | Upland                    | 96.2 ± 0.3              |
| <b>0.053 mm</b>   | Control             | Lowland                   | 98.2 ± 0.5              |
|                   |                     | Upland                    | 98.0 ± 0.4              |
|                   | Irrigated           | Lowland                   | 98.0 ± 0.3              |
|                   |                     | Upland                    | 98.0 ± 0.3              |
